# Supplementary material
Source: publisher figshare collection journal article supplement (https://brill.figshare.com/articles/dataset/_/21564102)
Supplement: Supplementary file 1 [file 1]

# Isnād Diagrams

## Onomastic Abbreviations

### *Personal Names*

|                         |                      |
|-------------------------|----------------------|
| A. = Aḥmad              | Ḥu. = Ḥusayn         |
| ‘AAz. = ‘Abd al-‘Azīz   | ‘Ī. = ‘Īsā           |
| ‘Ab. = ‘Abbās           | Ibr. = Ibrāhīm       |
| ‘ABq. = ‘Abd al-Bāqī    | Iḥq. = Ishāq         |
| ‘AD. = ‘Abd al-Dā‘im    | Ism. = Ismā‘īl       |
| ‘AGh. = ‘Abd al-Ghāfir  | J. = Ja‘far          |
| ‘AHD. = ‘Abd al-Hādī    | Lth. = Layth         |
| ‘AḤmd. = ‘Abd al-Ḥamīd  | M. = Muḥammad        |
| ‘AK. = ‘Abd al-Karīm    | Ms. = Mūsā           |
| ‘Al. = ‘Abdallāh        | Mṣ. = Muṣṭafā        |
| ‘ALt. = ‘Abd al-Laṭīf   | Msd. = Mas‘ūd        |
| ‘AM. = ‘Abd al-Mun‘im   | Mṣr. = Manṣūr        |
| ‘AMn. = ‘Abd al-Mu‘min  | Q. = Qāsim           |
| ‘AMk. = ‘Abd al-Malik   | S. = Sa‘īd           |
| ‘AMz. = ‘Abd al-Mu‘izz  | Sf. = Sufyān         |
| ‘AR. = ‘Abd al-Raḥmān   | Sh. = Sarḥān         |
| ‘ARḥ. = ‘Abd al-Raḥīm   | Sul. = Sulaymān      |
| ‘ARzq. = ‘Abd al-Razzāq | ‘U. = ‘Umar          |
| ‘AS. = ‘Abd al-Sallām   | ‘UAL. = ‘Ubayd Allāh |
| ‘AṢ. = ‘Abd al-Ṣamad    | ‘Uth. = ‘Uthmān      |
| ‘AW. = ‘Abd al-Wāḥid    | Yf. = Yūsuf          |
| ‘AWhb. = ‘Abd al-Wahhāb | Yḥ. = Yaḥyā          |
| Dwd. = Dāwūd            | Yq. = Ya‘qūb         |
| Fṭ. = Fāṭima            | Ys. = Yūnus          |
| Ḥ. = Ḥasan              | Zb. = Zaynab         |
| Hsh. = Hishām           | Zk. = Zakariyyā      |

## *Names of Places*

A. = al-Andalus

Al. = Aleppo

B. = Baghdad

D. = Damascus

E. = Egypt

I. = Isfahan

J. = Jerusalem

Md. = Medina

Mk. = Mecca

Mrk. = Marrakesh

N. = Naysābūr

NA. = North Africa

Ns. = Nasā

Q. = Qayrawān

Qz. = Qazvin

S. = Syria

Ş. = Şan‘ā’

Sh. = Shiraz

Y. = Yemen
