# Supplementary material
Source: publisher figshare collection journal article supplement (https://brill.figshare.com/articles/dataset/_/21564102)
Supplement: Supplementary file 2 [file 1]

## Diagrams

- 1 Al-Khaṭīb al-Baghdādī's biographical sources about Muslim 383
- 2 Ibn 'Asākir's unique *isnād* of biographical reports about Muslim 384
- 3 The transmission of the *Ṣaḥīḥ* through Ibrāhīm b. Sufyān (the western branch) 385
- 4 The transmission of the *Ṣaḥīḥ* through Ibrāhīm b. Sufyān (the eastern branch) 386
- 5 Truncated transmissions on the authority of 'Abd al-Ghāfir al-Fārisī → al-Julūdī → Ibn Sufyān 387
- 6 Truncated transmissions on the authority of al-Furāwī → 'Abd al-Ghāfir al-Fārisī → al-Julūdī → Ibn Sufyān 388
- 7 Truncated transmissions on the authority of al-Mu'ayyad al-Ṭūsī → 'Abd al-Ghāfir al-Fārisī → al-Julūdī → Ibn Sufyān 389
- 8 Truncated transmissions on the authority of 'Abd al-Ghāfir al-Fārisī → al-Julūdī → Ibn Sufyān 390
- 9 Truncated transmissions on the authority of al-Raḍī b. al-Burhān → 'Abd al-Ghāfir al-Fārisī → al-Julūdī → Ibn Sufyān 391
- 10 Truncated transmissions on the authority of Ibn Bundār al-Rāzī and 'Abdallāh al-Shantajālī → al-Julūdī → Ibn Sufyān 392
- 11 The transmission of the *Ṣaḥīḥ* through Ibn Māhān → Aḥmad b. Muḥammad al-Ashqar → Aḥmad b. 'Alī al-Qalānisī → Muslim 393
- 12 Truncated transmissions through Ibn Māhān → Aḥmad b. Muḥammad al-Ashqar → Aḥmad b. 'Alī al-Qalānisī → Muslim 394
- 13 The transmission of the *Ṣaḥīḥ* through Makkī b. 'Abdān and Abū Ḥāmid al-Sharqī → Muslim 395
